# Supplementary material for: Multi-scale comparative transcriptome analysis reveals key genes and metabolic reprogramming processes associated with oil palm fruit abscission
Source: PubMed Central journal article supplement (PMC7879690; doi:10.1186/s12870-021-02874-1), 2021-02-11

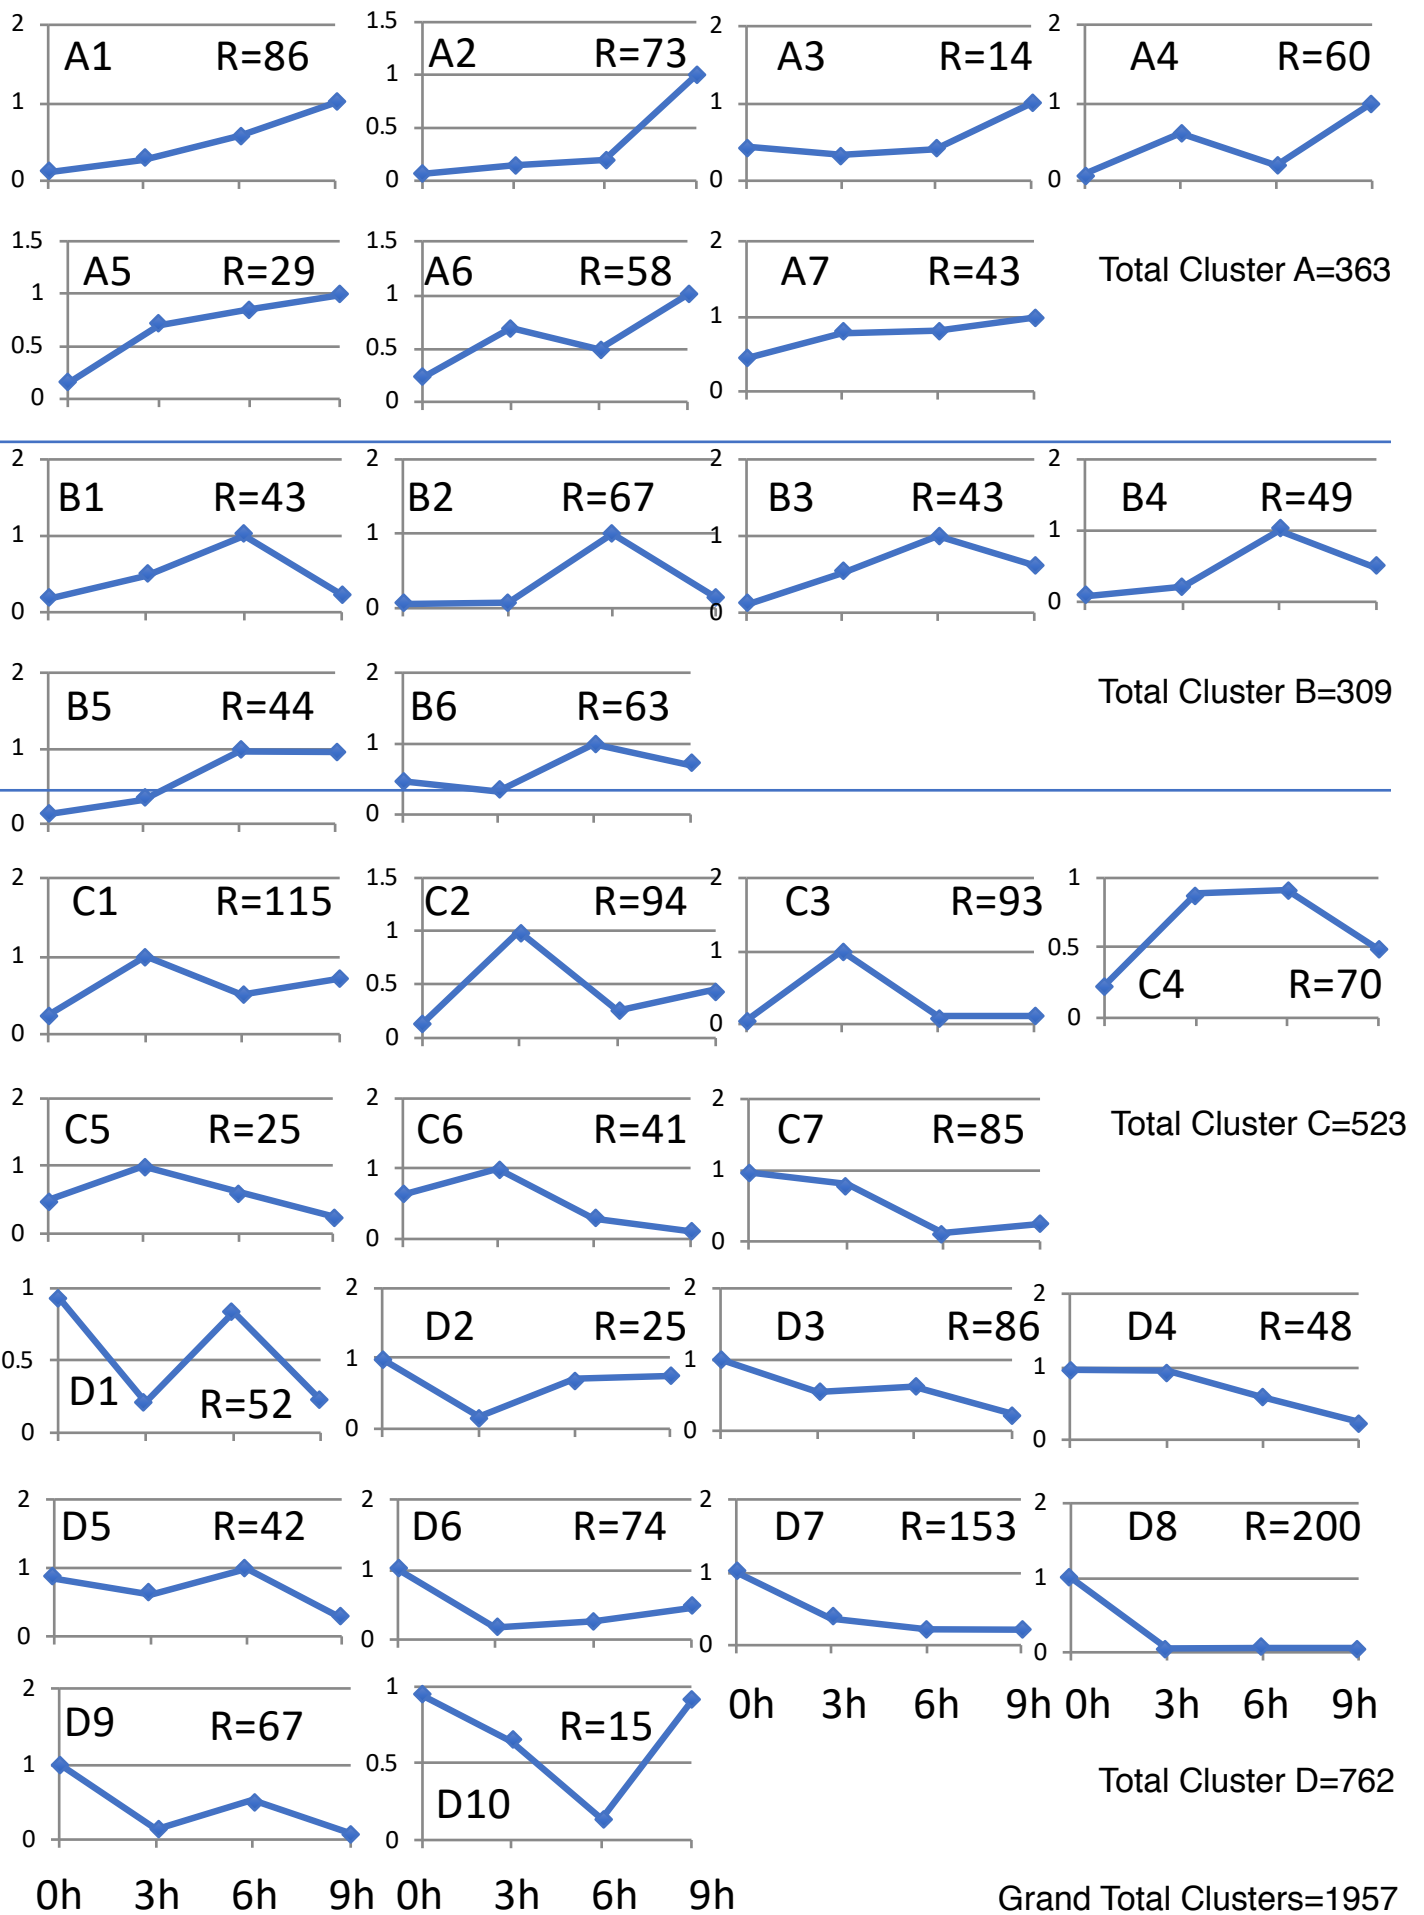

Supplement: 12870_2021_2874_MOESM1_ESM.pdf [file 12870_2021_2874_MOESM1_ESM.pdf]
