# Supplementary material for: Multi-scale comparative transcriptome analysis reveals key genes and metabolic reprogramming processes associated with oil palm fruit abscission
Source: PubMed Central journal article supplement (PMC7879690; doi:10.1186/s12870-021-02874-1), 2021-02-11
Supplement: 12870_2021_2874_MOESM2_ESM.pdf [file 12870_2021_2874_MOESM2_ESM.pdf]

A

| <b>Samples</b>         | <b>Number of reads</b> | <b>Avg. length (bp)</b> | <b>Total bp (Mbp)</b> | <b>Subtotals (reads)</b> | <b>Total contigs</b> | <b>Unique contigs</b> |
|------------------------|------------------------|-------------------------|-----------------------|--------------------------|----------------------|-----------------------|
| AZ-0h-30DAP            | 46,048                 | 413                     | 19                    | 657,819                  | 36,583               | 4,669                 |
| AZ-3h-30DAP            | 164,920                | 398.2                   | 65                    |                          |                      |                       |
| AZ-6h-30DAP            | 120,367                | 422                     | 50                    |                          |                      |                       |
| AZ-9h-30DAP            | 326,484                | 425                     | 138.6                 | 553,805                  | 33,740               | 2,856                 |
| AZ-0h-150DAP           | 164,027                | 437                     | 71.6                  |                          |                      |                       |
| AZ-3h-150DAP           | 86,217                 | 371.7                   | 32                    |                          |                      |                       |
| AZ-6h-150DAP           | 121,711                | 431.5                   | 52                    |                          |                      |                       |
| AZ-9h-150DAP           | 181,850                | 399                     | 72                    | 1,099,385                | 40,897               | 6,930                 |
| P-0h-150DAP            | 339,657                | 427                     | 145                   |                          |                      |                       |
| P-3h-150DAP            | 278,933                | 407.8                   | 113                   |                          |                      |                       |
| P-6h-150DAP            | 416,935                | 450                     | 187.8                 |                          |                      |                       |
| P-9h-150DAP            | 63,860                 | 395                     | 25                    |                          |                      |                       |
| <b>Totals/Averages</b> | <b>2,311,009</b>       | <b>415</b>              | <b>971</b>            |                          |                      |                       |

B

| <b>454 Sequencing data</b>         | <b>Numbers</b> |
|------------------------------------|----------------|
| Reads Assembled                    | 1,563,975      |
| Reads not assembled (singletons)   | 747,034        |
| Percentage singletons              | 32%            |
| <b>Total non-redundant contigs</b> | <b>51,804</b>  |
